# Supplementary material for: A crystalline/amorphous CoP@CoB hierarchical core–shell nanorod array for enhanced hydrogen evolution
Source: Royal Society of Chemistry journal article supplement (doi:10.1039/d1ta02783b), 2021-01-01
Supplement: d1ta02783b1.pdf [file d1ta02783b1.pdf]

## Electronic Supplementary Information

### Experimental section

*Materials:* All reagents were directly utilized without further purification.  $\text{Co}(\text{NO}_3)_2 \cdot 6\text{H}_2\text{O}$  (Shanghai Macklin Biochemical Co. Ltd),  $\text{CO}(\text{NH}_2)_2$  (Shanghai Macklin Biochemical Co. Ltd),  $\text{NH}_4\text{F}$  (Sinopharm Chemical Reagent Co. Ltd),  $\text{NaH}_2\text{PO}_2 \cdot \text{H}_2\text{O}$  (Shanghai Macklin Biochemical Co. Ltd),  $\text{C}_2\text{H}_5\text{OH}$  (Tianjin Fuyu Fine Chemical Co. Ltd),  $\text{KOH}$  (Sinopharm Chemical Reagent Co. Ltd),  $\text{NaBH}_4$  (Chengdu Aikeda Chemical Reagent Co. Ltd), Carbon cloth (Ce Tech Co. Ltd), Platinum on carbon (20% Pt/C). The ultrapure water was purified through a Millipore system used throughout all experiments.

*Synthesis of  $\text{Co}(\text{CO}_3)_{0.5}(\text{OH})_{0.11} \cdot \text{H}_2\text{O}$  nanorod array on CC (CoCH NRA/CC):* Carbon cloth (CC) with area of  $1 \times 2 \text{ cm}^2$  was treated with nitric acid solution (34 wt%) at  $60 \text{ }^\circ\text{C}$  for 2 h followed washing with ethanol and water, respectively. Treated CC was then dropped into Teflon-lined stainless reactors (20 ml) containing 16 ml ultrapure water, 0.72 mmol  $\text{Co}(\text{NO}_3)_2 \cdot 6\text{H}_2\text{O}$ , 1.8 mmol  $\text{CO}(\text{NH}_2)_2$  and 0.72 mmol  $\text{NH}_4\text{F}$ . After the hydrothermal reaction conducting at  $120 \text{ }^\circ\text{C}$  for 6h, CoCH NRA is generated on CC.

*Fabrication of CoP NRA/CC:* The obtained CoCH NRA/CC was put in the porcelain crucible, which was placed at the downstream end, while another porcelain crucible with 500 mg  $\text{NaH}_2\text{PO}_2$  powder was placed at the upstream end of the furnace. The samples were annealing at  $300 \text{ }^\circ\text{C}$  for 2 h under  $\text{N}_2$  atmosphere to get CoP NRA/CC.

*Synthesis of CoP-amorphous CoB hierarchical nanorod array (CoP@a-CoB HNRA) on CC:* Firstly,  $\text{CoP}@ \text{Co}(\text{OH})_2$  HNRA/CC was obtained by a chronoamperometry electrolysis strategy with the constant potential of  $-0.16 \text{ V}$  (vs. RHE) for 8 h, which was performed in 1.0 M  $\text{KOH}$  by using the synthesized CoP NTA/CC as working electrode. Then the prepared  $\text{CoP}@ \text{Co}(\text{OH})_2$  HNRA/CC was immersed in a mixed solution of 1.0 M  $\text{NaBH}_4$  and 0.1 M  $\text{NaOH}$  for 1 min to obtain  $\text{CoP}@ \text{a-CoB}$  HNRA. The  $\text{CoP}@ \text{a-CoB}$  NRA without hierarchical structure was obtained through direct boronizing treatment of CoP NRA in 1.0 M  $\text{NaBH}_4$  and 0.1 M  $\text{NaOH}$  for 1 min.

*Synthesis of amorphous CoB nanosheet:* In a typical procedure, 0.1 g  $\text{CoCl}_2$  and 20 g  $\text{CO}(\text{NH}_2)_2$  was blended and milled mechanically. The resultant pink mixture was transferred to a glass vessel. Then, the pink mixture was desiccated in an oven for about 15 min at  $150 \text{ }^\circ\text{C}$  until the sample changed into blue in color. Subsequently, the milled

NaBH<sub>4</sub> powder was sprinkled on the mixture. After 48 h, the reaction is finished, only black products were observed. The obtained black powder was washed with ultrapure water, and finally desiccated in a vacuum oven at 60 °C for 6 h to obtain amorphous CoB nanosheet.

*Characterizations:* Powder X-ray diffraction (XRD) measurements were carried out on Rigaku Smartlab powder diffractometer using a Cu Ka radiation ( $\lambda = 1.5418 \text{ \AA}$ ). Scanning electron microscope (SEM) images were obtained on JEOL JSM-7800F. Transition electron microscope (TEM), high-resolution TEM (HRTEM), high-angle annular dark field scanning TEM (HAADF-STEM) and elemental mappings were recorded on JEOL 2100F with 200 kV. The X-ray photoelectron spectroscopy (XPS) measurement was carried out on ESCALAB XI+ (Thermo Fisher), the binding energies were corrected by using C 1s peak of adventitious carbon to 284.5 eV.

*Electrochemical measurements:* All electrochemical tests were conducted with a standard three-electrode system on a CHI 760E station (CH instruments, China). The as-synthesized catalyst supported on CC was directly used as working electrode. As for contrastive Pt/C and a-CoB NS electrocatalysts, sample powder along with ethanol and Nafion were treated to form homogeneous solution. Then the well dispersed solution was dripped onto clean CC and naturally dried in air, finally generating the Pt/C and a-CoB mass loading of 0.1 mg cm<sup>-2</sup> and 1.5 mg cm<sup>-2</sup>, respectively. The graphite rod and saturated calomel electrode (SCE) serve as counter electrode and reference electrode, respectively. Linear sweep voltammetry (LSV) was tested to investigate the electrocatalytic activity in H<sub>2</sub>-saturated 1.0 M KOH or 0.5 M H<sub>2</sub>SO<sub>4</sub> at a scan rate of 10 mV s<sup>-1</sup>. All the measured potentials were corrected with iR-compensation and referred to reversible hydrogen electrode (RHE) with the equation of  $E (\text{vs RHE}) = E (\text{vs SCE}) + 0.059 \cdot \text{pH} + 0.2415$ . Chronopotentiometry with the constant current density of 10 mA cm<sup>-2</sup> and multi-current step test were used to evaluate the electrocatalytic stability. To estimate the electrochemical surface area (ECSA), the electrochemical double-layer capacitance ( $C_{dl}$ ) measurements were carried out by using CVs with different scan rates of 20, 40, 60, 80, 100 mV s<sup>-1</sup>. Electrochemical impedance spectroscopy (EIS) measurement were performed at the overpotentials of 72 mV and 59 mV in 1.0 M KOH and 0.5 M H<sub>2</sub>SO<sub>4</sub>, respectively, with frequency from 0.1 to 100 KHz.

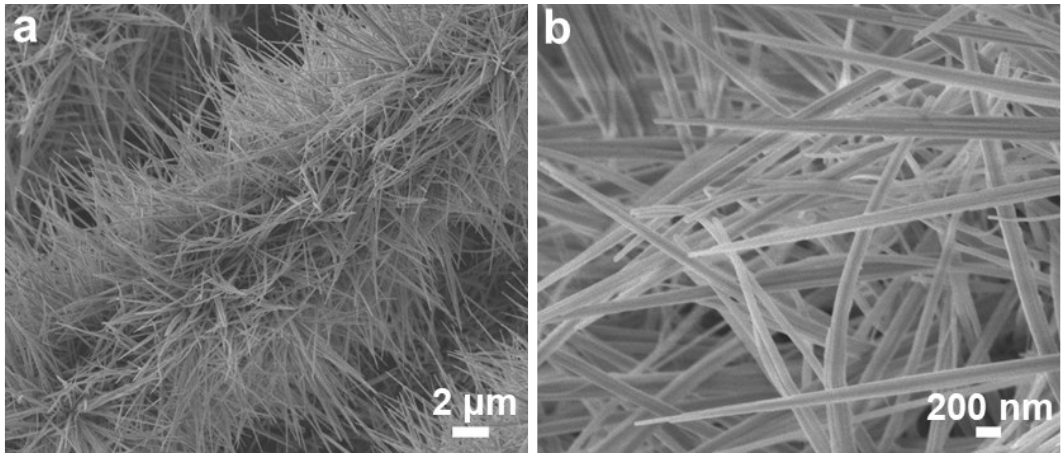

**Fig. S1.** SEM images of CoCH NRA on CC with low and high magnification.

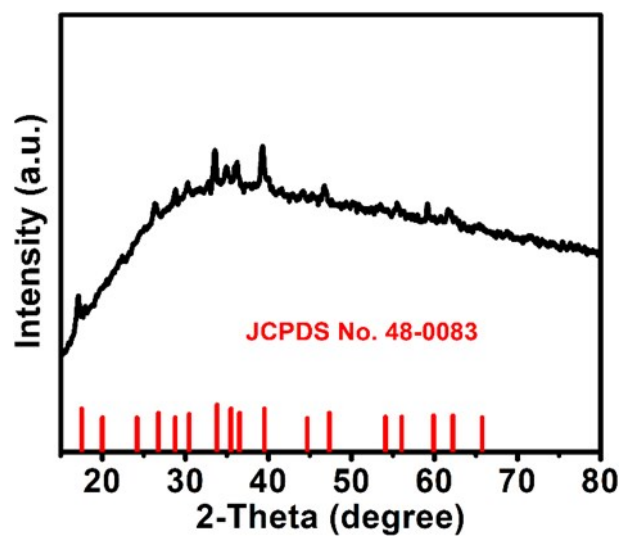

Fig. S2. XRD pattern of CoCH NRA.

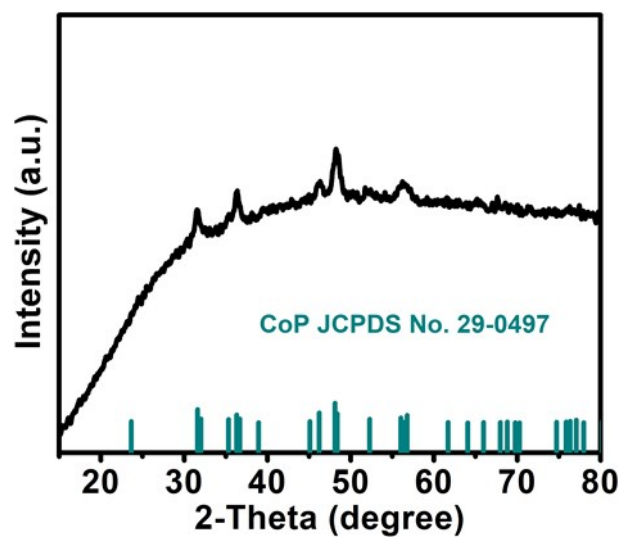

Fig. S3. XRD pattern of CoP NRA.

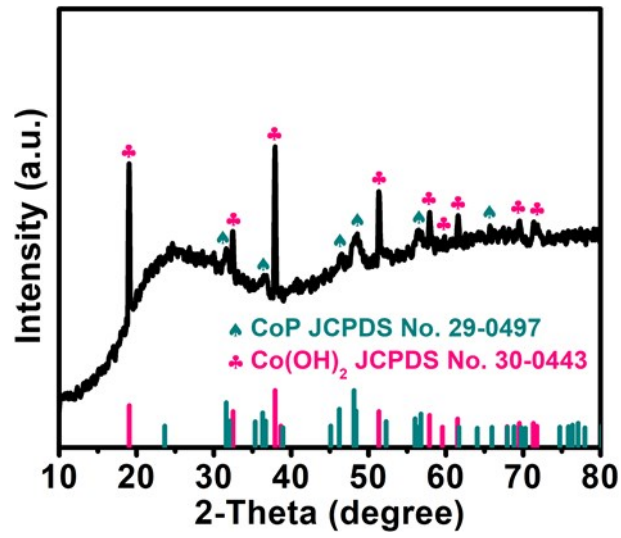

Fig. S4. XRD pattern of CoP@Co(OH)<sub>2</sub> HNRA.

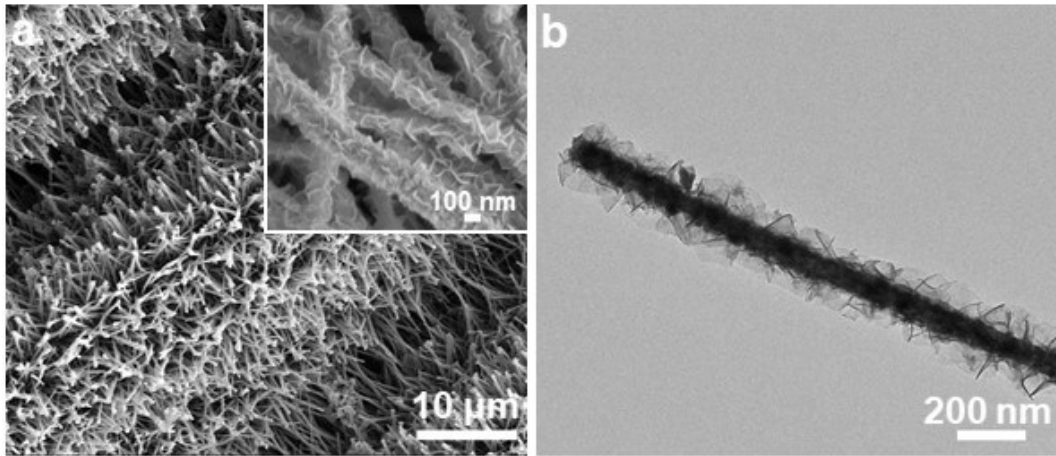

**Fig. S5.** (a) SEM images of CoP@Co(OH)<sub>2</sub> HNRA on CC with different magnification. (b) TEM image of single CoP@Co(OH)<sub>2</sub> hierarchical nanorod.

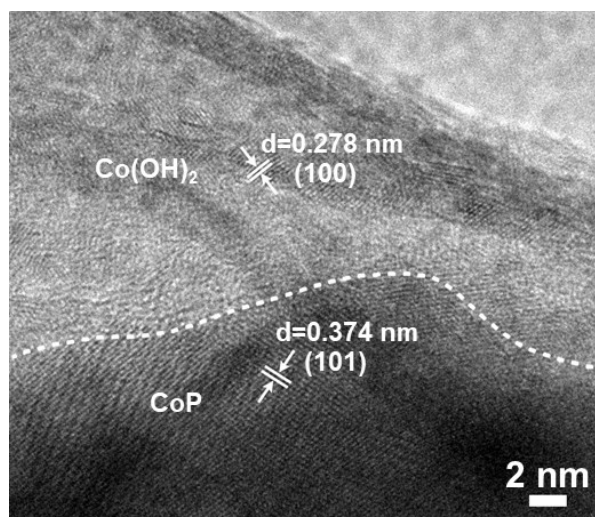

**Fig. S6.** HRTEM image of CoP@Co(OH)<sub>2</sub> HNRA.



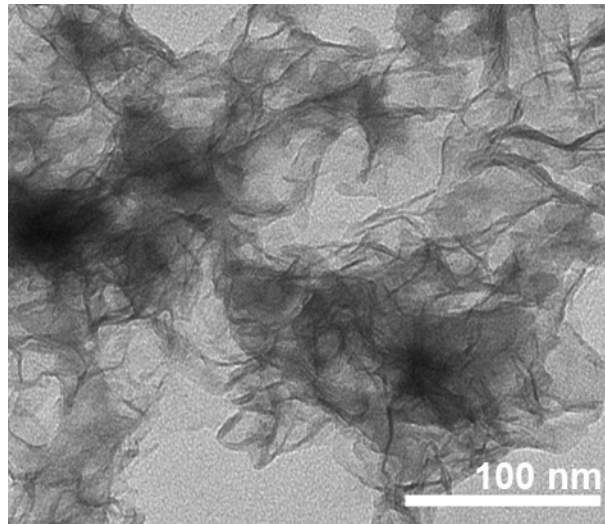

**Fig. S7.** TEM image of a-CoB NS.

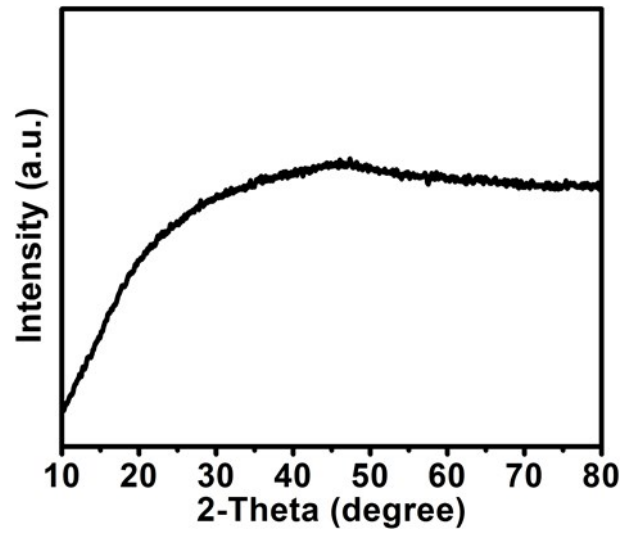

**Fig. S8.** XRD pattern of a-CoB NS.

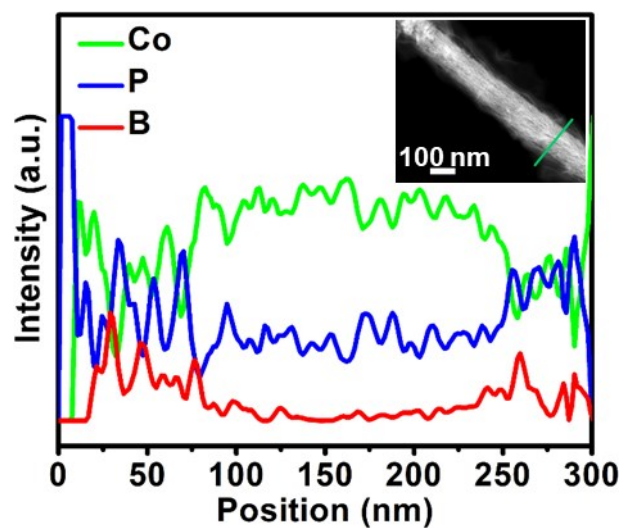

**Fig. S9.** The HAADF-STEM image of CoP@a-CoB hierarchical nanorod and corresponding line-scan profile.

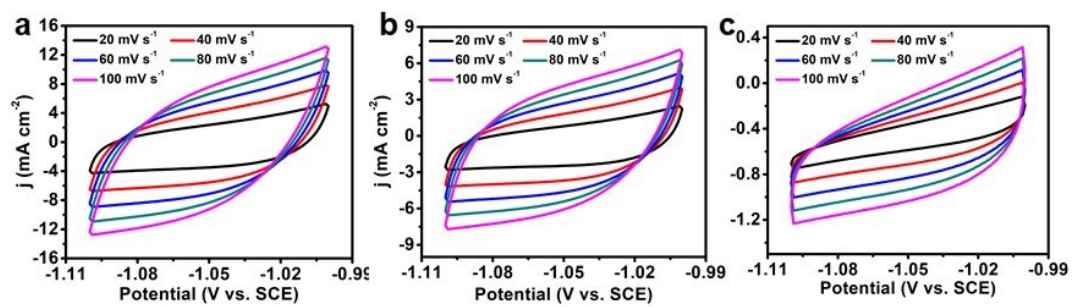

**Fig. S10.** CV curves of (a) CoP@a-CoB HNRA, (b) CoP NRA and (c) a-CoB NS with different scan rates (20-100  $\text{mV s}^{-1}$ ) in 1.0 M KOH.

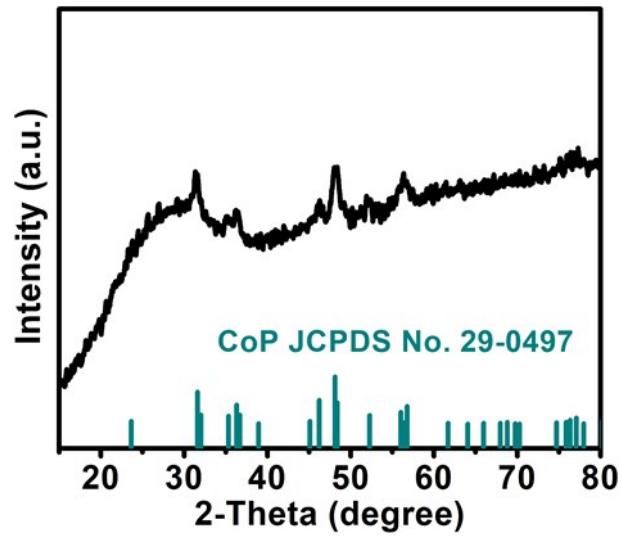

Fig. S11. XRD pattern of CoP@a-CoB NRA.

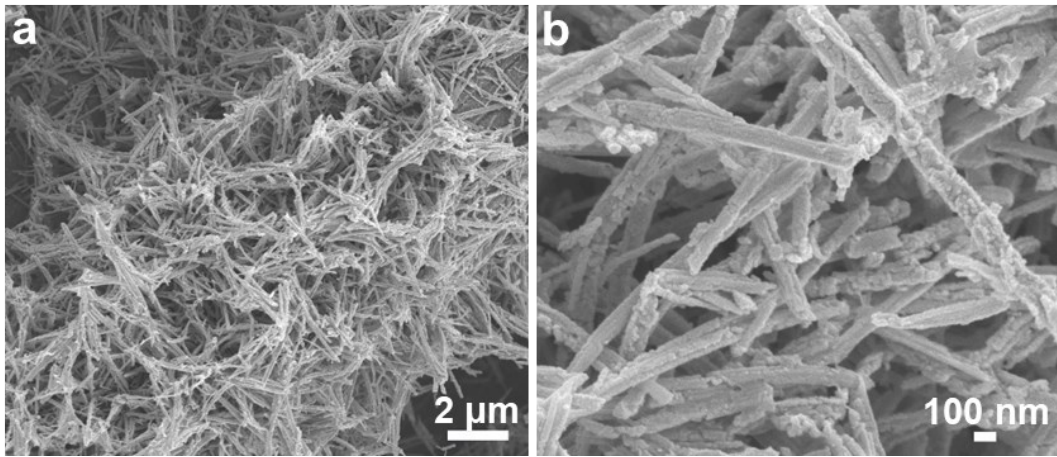

**Fig. S12.** SEM images of CoP@a-CoB NRA on CC with low and high magnification.

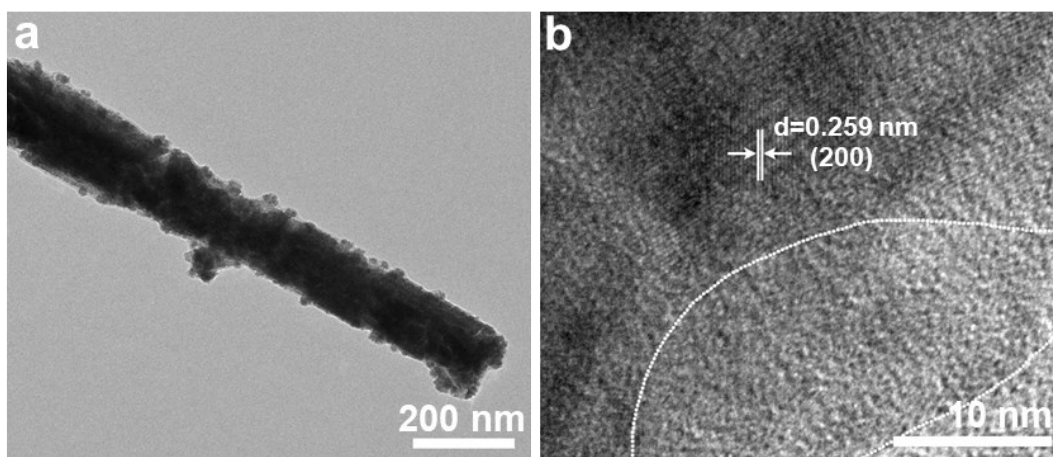

**Fig. S13.** (a) TEM image and (b) HRTEM image of CoP@a-CoB NRA.

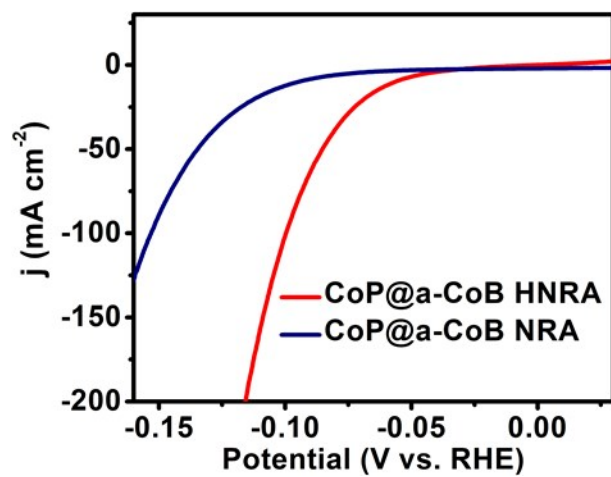

**Fig. S14.** Polarization curves of CoP@a-CoB HNRA and CoP@a-CoB NRA in 1.0 M KOH.



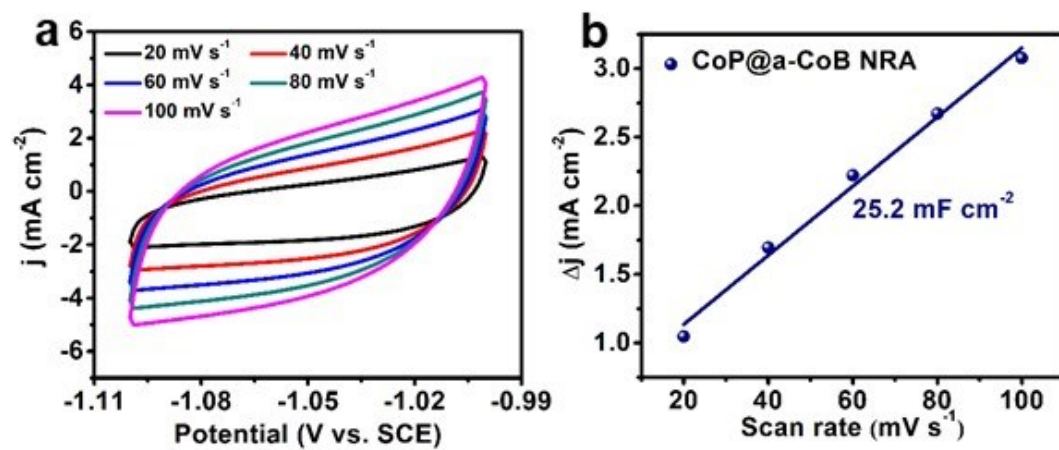

**Fig. S15.** (a) CV curves of CoP@a-CoB NRA with different scan rates (20-100 mV s<sup>-1</sup>) in 1.0 M KOH. (b) The plot of capacitive current density as a function of scan rate at -1.05 V vs. SCE.

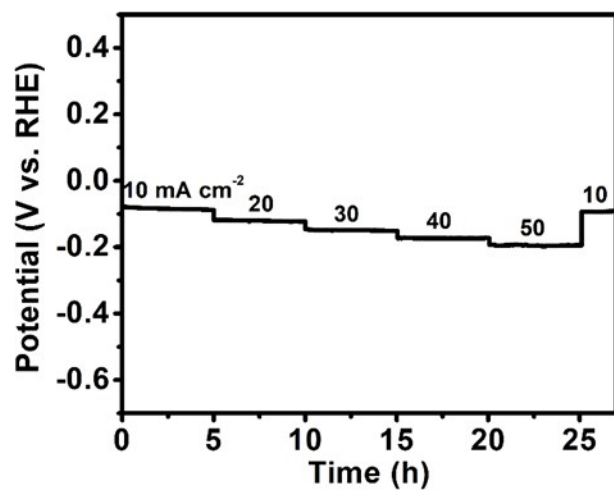

**Fig. S16.** Multi-current test at 10-50 mA cm<sup>-2</sup> for CoP@a-CoB HNRA in 1.0 M KOH.

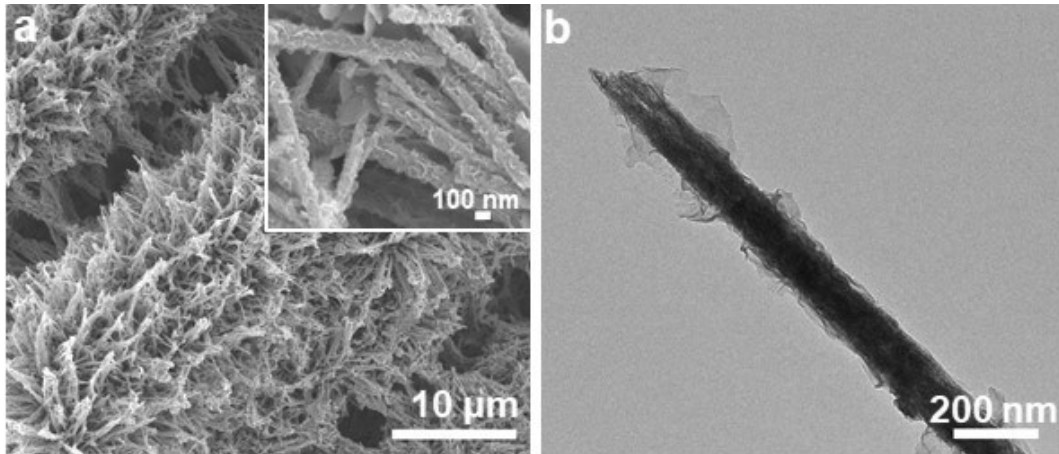

**Fig. S17.** The characterizations after stability test in 1.0 M KOH. (a) SEM images of CoP@a-CoB HNRA on CC and (b) TEM image of one CoP@a-CoB hierarchical nanorod.

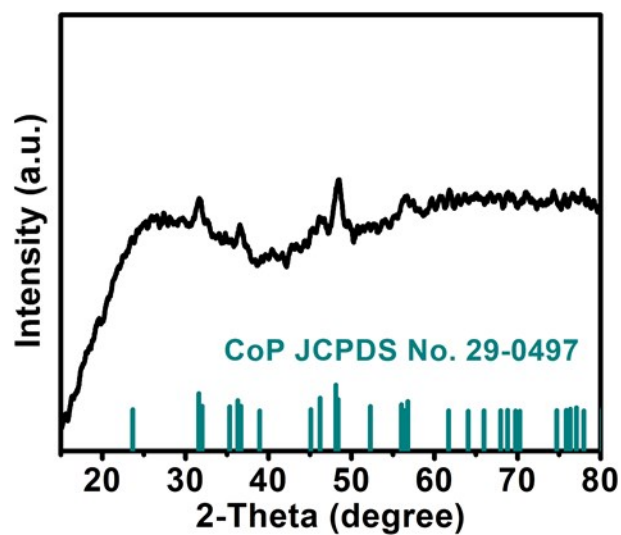

**Fig. S18.** XRD pattern of CoP@a-CoB HNRA after chronopotentiometry test in 1.0 M KOH.

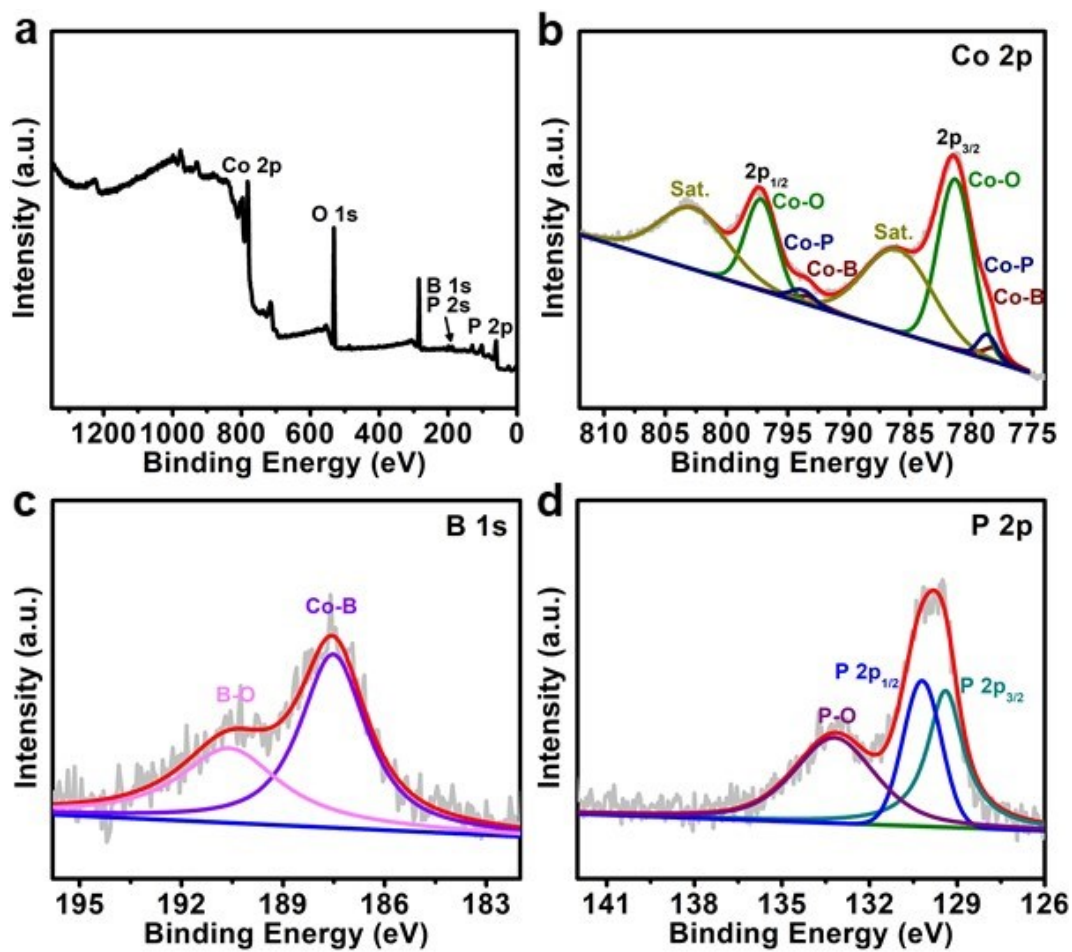

**Fig. S19.** The XPS characterizations of CoP@a-CoB HNRA after chronopotentiometry test in 1.0 M KOH. (a) Full XPS spectra. High-resolution XPS spectra of (b) Co 2p, (c) B 1s and (d) P 2p.

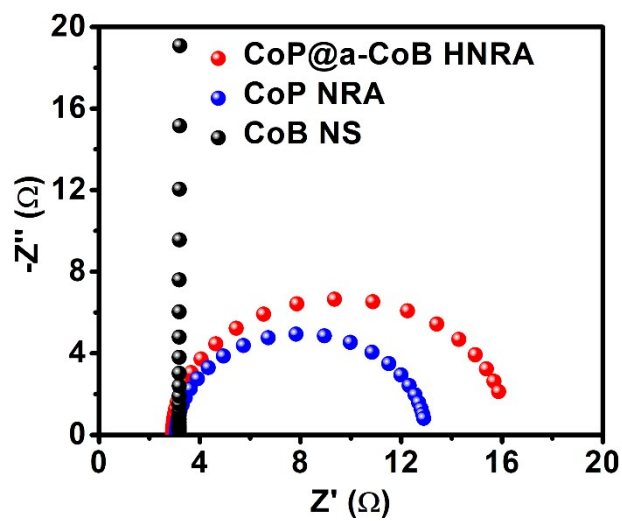

**Fig. S20.** EIS measurements of CoP@a-CoB HNRA, CoP NRA and CoB NS in 0.5 M H<sub>2</sub>SO<sub>4</sub>.

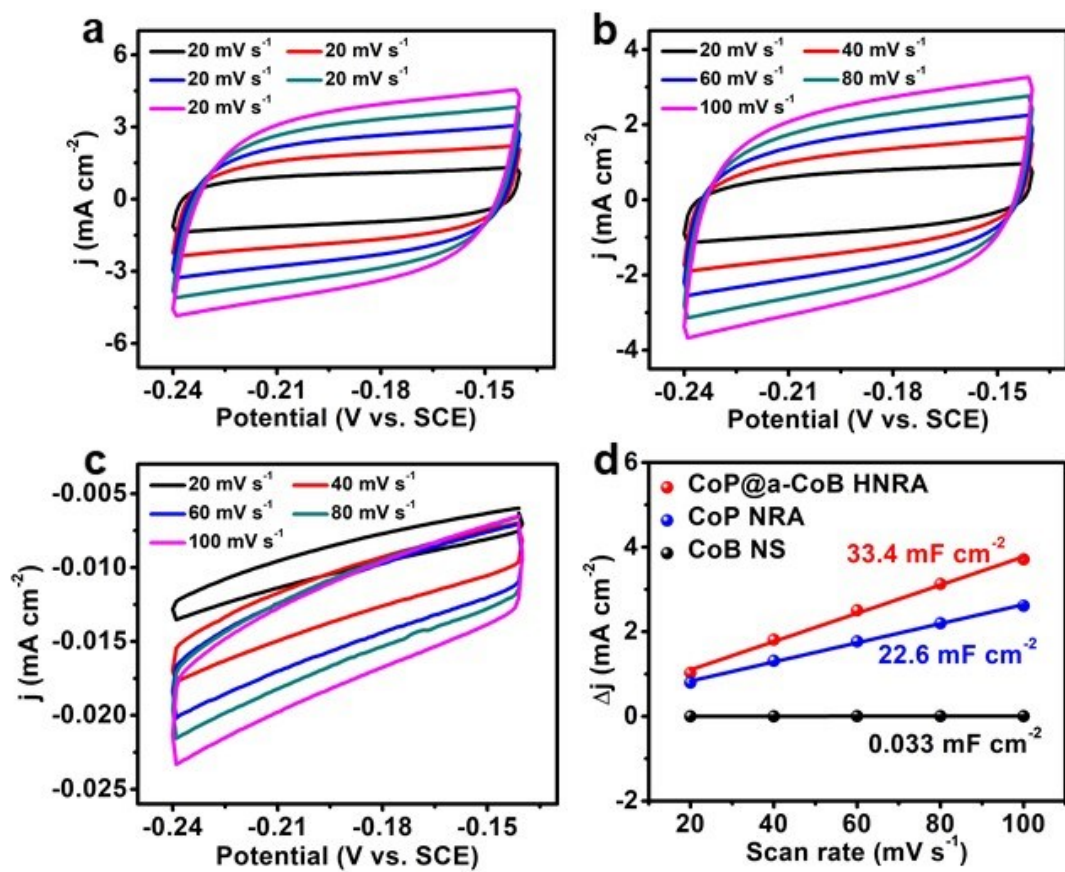

**Fig. S21.** CV curves of CoP@a-CoB HNRA (a), CoP NRA (b) and a-CoB NS (c) with different scan rates (20-100 mV s<sup>-1</sup>) in 0.5 M H<sub>2</sub>SO<sub>4</sub>. (d) Plots of capacitive current density as a function of scan rate at -0.19 V vs. SCE.

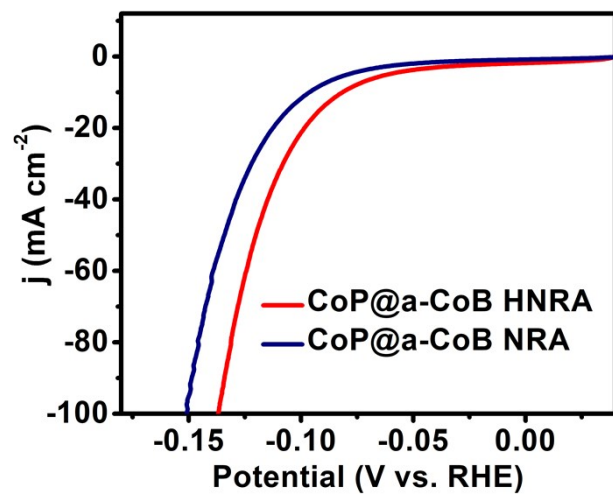

**Fig. S22.** Polarization curves of CoP@a-CoB HNRA and CoP@a-CoB NRA in 0.5 M H<sub>2</sub>SO<sub>4</sub>.



**Table S1.** The HER performance of CoP@a-CoB HNRA and reported electrocatalysts in alkaline solution.

| Catalyst                                              | Overpotential at 10 mA cm <sup>-2</sup> (mV) | Tafel slope (mV dec <sup>-1</sup> ) | Substrate | Electrolyte      | Reference        |
|-------------------------------------------------------|----------------------------------------------|-------------------------------------|-----------|------------------|------------------|
| <b>CoP@a-CoB HNRA</b>                                 | <b>56.3</b>                                  | <b>62.0</b>                         | <b>CC</b> | <b>1.0 M KOH</b> | <b>This work</b> |
| CoP/Ni <sub>5</sub> P <sub>4</sub> /CoP               | 71                                           | 58                                  | NF        | 1.0 M KOH        | 1                |
| Co/Co <sub>2</sub> P@ACF/CNT                          | 78                                           | 49                                  | GCE       | 1.0 M KOH        | 2                |
| NiCoFeB                                               | 345                                          | 98                                  | GCE       | 1.0 M KOH        | 3                |
| Co-Mo <sub>2</sub> C-CNF                              | 128                                          | 60                                  | NFM       | 1.0 M KOH        | 4                |
| N-CoP                                                 | 39                                           | 58                                  | CC        | 1.0 M KOH        | 5                |
| Ni <sub>0.89</sub> Co <sub>0.11</sub> Se <sub>2</sub> | 85                                           | 52                                  | NF        | 1.0 M KOH        | 6                |
| N-Co-S/G                                              | 74.5                                         | 61.9                                | GCE       | 1.0 M KOH        | 7                |
| Co <sub>2</sub> P/CoNPC                               | 208                                          | 83.9                                | GCE       | 1.0 M KOH        | 8                |
| Ce-CoP                                                | 92                                           | 63.5                                | GCE       | 1.0 M KOH        | 9                |
| C-Co <sub>x</sub> P                                   | 121                                          | 62                                  | GCE       | 1.0 M KOH        | 10               |
| HNDCM-Co/CoP                                          | 135                                          | 64                                  | PCM       | 1.0 M KOH        | 11               |
| W-CoP                                                 | 94                                           | 63                                  | CC        | 1.0 M KOH        | 12               |

**Table S2.** The HER performance of CoP@a-CoB HNRA and reported electrocatalysts in acidic solution.

| Catalyst                                  | Overpotential at 10 mA cm <sup>-2</sup> (mV) | Tafel slope (mV dec <sup>-1</sup> ) | Substrate | Electrolyte                              | Reference        |
|-------------------------------------------|----------------------------------------------|-------------------------------------|-----------|------------------------------------------|------------------|
| <b>CoP@a-CoB HNRA</b>                     | <b>81</b>                                    | <b>55.4</b>                         | <b>CC</b> | <b>0.5 M H<sub>2</sub>SO<sub>4</sub></b> | <b>This work</b> |
| CoP-CNTs                                  | 139                                          | 58                                  | GCE       | 0.5 M H <sub>2</sub> SO <sub>4</sub>     | 13               |
| CoP                                       | 67                                           | 51                                  | CC        | 0.5 M H <sub>2</sub> SO <sub>4</sub>     | 14               |
| N-Co-S/G                                  | 67.7                                         | 56.3                                | GCE       | 0.5 M H <sub>2</sub> SO <sub>4</sub>     | 15               |
| Ni <sub>2</sub> P/OMM-CoN-C               | 68                                           | 37                                  | GCE       | 0.5 M H <sub>2</sub> SO <sub>4</sub>     | 16               |
| Ce-CoP                                    | 54                                           | 54                                  | GCE       | 0.5 M H <sub>2</sub> SO <sub>4</sub>     | 9                |
| C-Co <sub>x</sub> P                       | 109                                          | 55                                  | GCE       | 0.5 M H <sub>2</sub> SO <sub>4</sub>     | 10               |
| Co-P-B                                    | 172                                          | 68                                  | CP        | 0.5 M H <sub>2</sub> SO <sub>4</sub>     | 17               |
| HNDKM-Co/CoP                              | 138                                          | 66                                  | PCM       | 0.5 M H <sub>2</sub> SO <sub>4</sub>     | 18               |
| NiCo <sub>2</sub> P <sub>x</sub> nanowire | 104                                          | 59.6                                | CF        | 0.5 M H <sub>2</sub> SO <sub>4</sub>     | 19               |
| W-CoP NAs                                 | 89                                           | 58                                  | CC        | 0.5 M H <sub>2</sub> SO <sub>4</sub>     | 12               |

## References

- 1 I. K. Mishra, H. Zhou, J. Sun, F. Qin, K. Dahal, J. Bao, S. Chen and Z. Ren, *Energy Environ. Sci.*, 2018, **11**, 2246–2252.
- 2 F. Wang, L. Hu, R. Liu, H. Yang, T. Xiong, Y. Mao, M.-S. (J. Tang) Balogun, G. Ouyang and Y. Tong, *J. Mater. Chem. A*, 2019, **7**, 11150–11159.
- 3 Y. Li, B. Huang, Y. Sun, M. Luo, Y. Yang, Y. Qin, L. Wang, C. Li, F. Lv, W. Zhang and S. Guo, *Small*, 2019, **15**, 1804212.
- 4 J. Wang, R. Zhu, J. Cheng, Y. Song, M. Mao, F. Chen and Y. Cheng, *Chem. Eng. J.*, 2020, **379**, 125481.
- 5 Y. Men, P. Li, F. Yang, G. Cheng, S. Chen and W. Luo, *Appl. Catal. B*, 2019, **253**, 21–27.
- 6 B Liu, Y.-F. Zhao, H.-Q. Peng, Z.-Y. Zhang, C.-K. Sit, M.-F. Yuen, T.-R. Zhang and C.-S. Lee and W.-J. Zhang, *Adv. Mater.*, 2017, **29**, 1606521.
- 7 P. Sabhapathy, I. Shown, A. Sabbah, P. Raghunath, J.-L. Chen, W.-F. Chen, M.-C. Lin, K. H. Chen and L.-C. Chen, *Nano Energy*, 2021, **80**, 105544.
- 8 H. Liu, J. Guan, S. Yang, Y. Yu, R. Shao, Z. Zhang, M. Dou, F. Wang and Q. Xu, *Adv. Mater.*, 2020, **32**, 2003649.
- 9 W. Gao, M. Yan, H. Cheung, Z. Xia, X. Zhou, Y. Qin, C. Y. Wong, J. C. Ho, C. R. Chang and Y. Qu, *Nano Energy*, 2017, **38**, 290–296.
- 10 T.-S. Kim, H. J. Song, J.-C. Kim, B. Ju and D. W. Kim, *Small*, 2018, **14**, 1801284.
- 11 H. Wang, S. Min, Q. Wang, D. Li, G. Casillas, C. Ma, Y. Yang, Z. Liu, L.-J. Li, J. Yuan, M. Antonietti and T. Wu, *ACS Nano*, 2017, **11**, 4358–4364.
- 12 X. Wang, Y. Chen, B. Yu, Z. Wang, H. Wang, B. Sun, W. Li, D. Yang and W. Zhang, *Small*, 2019, **15**, 1902613.
- 13 C. Wu, Y. Yang, D. Dong, Y. Zhang and J. Li, *Small*, 2017, **13**, 1602873.
- 14 J. Tian, Q. Liu, A. M. Asiri and X. Sun, *J. Am. Chem. Soc.*, 2014, **136**, 7587–7590.
- 15 P. Sabhapathy, I. Shown, A. Sabbah, P. Raghunath, J.-L. Chen, W.-F. Chen, M.-C. Lin, K.-H. Chen and L.-C. Chen, *Nano Energy*, 2021, **80**, 105544.
- 16 T. Sun J. Dong, Y. Huang, W. Ran, J. Chen and L. Xu, *J. Mater. Chem. A*, 2018, **6**, 12751–12758.

- 17 J. Kim, H. Kim, S.-K. Kim and S. H. Ahn, *J. Mater. Chem. A*, 2018, **6**, 6282–6288.
- 18 H. Wang, S. Min, Q. Wang, D. Li, G. Casillas, C. Ma, Y. Li, Z. Liu, L.-J. Li, J. Yuan, M. Antonietti and T. Wu, *ACS Nano*, 2017, **11**, 4358–4364.
- 19 R. Zhang, X. Wang, S. Yu, T. Wen, X. Zhu, F. Yang, X. Sun, X. Wang and W. Hu, *Adv. Mater.*, 2017, **29**, 1605502.
